# Supplementary material for: Tissue environment, not ontogeny, defines murine intestinal intraepithelial T lymphocytes
Source: eLife. 2021 Sep 2;10:e70055. doi: 10.7554/eLife.70055 (PMC8463072; doi:10.7554/eLife.70055)
Supplement: Figure 1—source data 1. [file elife-70055-fig1-data1.xlsx]

## Sheet: Sheet1
Number of proteins identified (Fig 1c)
WT LN CD8+			P14 LN CD8+			T-IEL TCRb CD8ab			T-IEL TCRb CD8aa			T-IEL TCRgd CD8aa
Biological replicate 1	7016		Biological replicate 1	7322		Biological replicate 1	7185		Biological replicate 1	6713		Biological replicate 1	7409
Biological replicate 2	1006		Biological replicate 2	7324		Biological replicate 2	7173		Biological replicate 2	6708		Biological replicate 2	7409
Biological replicate 3	6990		Biological replicate 3	7333		Biological replicate 3	7157		Biological replicate 3	6700		Biological replicate 3	7394
Biological replicate 4	7011		Biological replicate 4	7334		Biological replicate 4	7159		Biological replicate 4	6692		Biological replicate 4	7396
Biological replicate 5	7015		Biological replicate 5	7333
Biological replicate 6	6994		Biological replicate 6	7333
Protein content in picrograms (Fig 1d)
WT LN CD8+			P14 LN CD8+			T-IEL TCRb CD8ab			T-IEL TCRb CD8aa			T-IEL TCRgd CD8aa
Biological replicate 1	49.85		Biological replicate 1	46.63		Biological replicate 1	50.42		Biological replicate 1	50.8		Biological replicate 1	61.68
Biological replicate 2	50.57		Biological replicate 2	56.77		Biological replicate 2	48.57		Biological replicate 2	51.17		Biological replicate 2	58.54
Biological replicate 3	49.26		Biological replicate 3	50.25		Biological replicate 3	46.87		Biological replicate 3	51.26		Biological replicate 3	56.41
Biological replicate 4	49.09		Biological replicate 4	51.11								Biological replicate 4	60.72
Biological replicate 5	50.54		Biological replicate 5	54.97
Biological replicate 6	50.37		Biological replicate 6	56.01
