# Supplementary material for: Tissue environment, not ontogeny, defines murine intestinal intraepithelial T lymphocytes
Source: eLife. 2021 Sep 2;10:e70055. doi: 10.7554/eLife.70055 (PMC8463072; doi:10.7554/eLife.70055)
Supplement: Figure 2—source data 1. [file elife-70055-fig2-data1.xlsx]

## Sheet: Sheet1
Global overview (fig 2a)
WT LN CD8+			T-IEL TCRb CD8ab
Histones	235065466		Histones	235684033
Ribosmal Proteins	77061105		Ribosmal Proteins	45226321
Cytoskeleton	38721492		Cytoskeleton	65803023
Glycolytic enzymes	20232520		Glycolytic enzymes	21313857
chaperones	6457209		chaperones	10998392
Granzymes	1017		Granzymes	13229272
