# Supplementary material for: Tissue environment, not ontogeny, defines murine intestinal intraepithelial T lymphocytes
Source: eLife. 2021 Sep 2;10:e70055. doi: 10.7554/eLife.70055 (PMC8463072; doi:10.7554/eLife.70055)
Supplement: Figure 3—source data 1. [file elife-70055-fig3-data1.xlsx]

## Sheet: Sheet1
OP-puromycin (fig 3f)
ratio OPP/CHX	WT LN CD8+	T-IEL TCRb CD8ab	T-IEL TCRb CD8aa	T-IEL TCRgd CD8aa
biological replicate 1	1.68165	0.995487	1.01708	0.959462
biological replicate 2	1.68165	1.09768	1.09303	1.06427
biological replicate 2	1.84734	1.13611	1.08086	1.07162
cytoplasmic ribosomes (fig 3a)
WT LN CD8+			T-IEL TCRb CD8ab			T-IEL TCRb CD8aa			T-IEL TCRgd CD8aa
Biological replicate 1	71230684		Biological replicate 1	49544469		Biological replicate 1	40978946		Biological replicate 1	50311527
Biological replicate 2	78759541		Biological replicate 2	44452773		Biological replicate 2	40642890		Biological replicate 2	46330629
Biological replicate 3	83302904		Biological replicate 3	42966560		Biological replicate 3	38108678		Biological replicate 3	42019966
Biological replicate 4	72872442								Biological replicate 4	44979346
Biological replicate 5	76046162
Biological replicate 6	80905513
mitochondrial ribosomes (fig 3a)
WT LN CD8+			T-IEL TCRb CD8ab			T-IEL TCRb CD8aa			T-IEL TCRgd CD8aa
Biological replicate 1	1230265		Biological replicate 1	536768		Biological replicate 1	308796		Biological replicate 1	545630
Biological replicate 2	1189672		Biological replicate 2	476660		Biological replicate 2	326610		Biological replicate 2	479176
Biological replicate 3	1082404		Biological replicate 3	467707		Biological replicate 3	340512		Biological replicate 3	448405
Biological replicate 4	1160417								Biological replicate 4	504327
Biological replicate 5	1206950
Biological replicate 6	1159715
pol I (fig 3b)
WT LN CD8+			T-IEL TCRb CD8ab			T-IEL TCRb CD8aa			T-IEL TCRgd CD8aa
Biological replicate 1	54345		Biological replicate 1	10985		Biological replicate 1	5153		Biological replicate 1	16299
Biological replicate 2	36648		Biological replicate 2	11804		Biological replicate 2	6085		Biological replicate 2	19619
Biological replicate 3	53400		Biological replicate 3	11171		Biological replicate 3	5580		Biological replicate 3	13129
Biological replicate 4	55497								Biological replicate 4	15457
Biological replicate 5	55797
Biological replicate 6	53763
pol II (fig 3b)
WT LN CD8+			T-IEL TCRb CD8ab			T-IEL TCRb CD8aa			T-IEL TCRgd CD8aa
Biological replicate 1	234348		Biological replicate 1	207669		Biological replicate 1	154297		Biological replicate 1	245304
Biological replicate 2	213537		Biological replicate 2	193644		Biological replicate 2	163231		Biological replicate 2	207858
Biological replicate 3	183001		Biological replicate 3	197807		Biological replicate 3	158742		Biological replicate 3	205268
Biological replicate 4	223406								Biological replicate 4	224732
Biological replicate 5	214525
Biological replicate 6	191679
pol III (fig 3b)
WT LN CD8+			T-IEL TCRb CD8ab			T-IEL TCRb CD8aa			T-IEL TCRgd CD8aa
Biological replicate 1	43848		Biological replicate 1	13040		Biological replicate 1	10020		Biological replicate 1	19358
Biological replicate 2	42912		Biological replicate 2	13592		Biological replicate 2	10945		Biological replicate 2	20205
Biological replicate 3	38881		Biological replicate 3	12836		Biological replicate 3	9864		Biological replicate 3	21983
Biological replicate 4	41634								Biological replicate 4	22121
Biological replicate 5	43158
Biological replicate 6	42257
