# Supplementary material for: Tissue environment, not ontogeny, defines murine intestinal intraepithelial T lymphocytes
Source: eLife. 2021 Sep 2;10:e70055. doi: 10.7554/eLife.70055 (PMC8463072; doi:10.7554/eLife.70055)
Supplement: Figure 4—source data 1. [file elife-70055-fig4-data1.xlsx]

## Sheet: Sheet1
ETC complex I (fig 3d)
WT LN CD8+			T-IEL TCRb CD8ab			T-IEL TCRb CD8aa			T-IEL TCRgd CD8aa
Biological replicate 1	273409		Biological replicate 1	291867		Biological replicate 1	215898		Biological replicate 1	389675
Biological replicate 2	287050		Biological replicate 2	259768		Biological replicate 2	214557		Biological replicate 2	322914
Biological replicate 3	272119		Biological replicate 3	274296		Biological replicate 3	250722		Biological replicate 3	347374
Biological replicate 4	270605								Biological replicate 4	370408
Biological replicate 5	283429
Biological replicate 6	287919
ETC Complex I accesory
WT LN CD8+			T-IEL TCRb CD8ab			T-IEL TCRb CD8aa			T-IEL TCRgd CD8aa
Biological replicate 1	1229350		Biological replicate 1	845665		Biological replicate 1	552124		Biological replicate 1	1137965
Biological replicate 2	1264718		Biological replicate 2	737844		Biological replicate 2	630456		Biological replicate 2	851664
Biological replicate 3	1142449		Biological replicate 3	805627		Biological replicate 3	654650		Biological replicate 3	814953
Biological replicate 4	1212958								Biological replicate 4	926964
Biological replicate 5	1258945
Biological replicate 6	1225844
ETC Complex II
WT LN CD8+			T-IEL TCRb CD8ab			T-IEL TCRb CD8aa			T-IEL TCRgd CD8aa
Biological replicate 1	456887		Biological replicate 1	408223		Biological replicate 1	413895		Biological replicate 1	545370
Biological replicate 2	455569		Biological replicate 2	411773		Biological replicate 2	409541		Biological replicate 2	448712
Biological replicate 3	462737		Biological replicate 3	454725		Biological replicate 3	535755		Biological replicate 3	476328
Biological replicate 4	437127								Biological replicate 4	513519
Biological replicate 5	426474
Biological replicate 6	443272
ETC Complex III
WT LN CD8+			T-IEL TCRb CD8ab			T-IEL TCRb CD8aa			T-IEL TCRgd CD8aa
Biological replicate 1	1982098		Biological replicate 1	1594942		Biological replicate 1	1246643		Biological replicate 1	3543425
Biological replicate 2	1964513		Biological replicate 2	1409506		Biological replicate 2	1447014		Biological replicate 2	1832466
Biological replicate 3	1761833		Biological replicate 3	1695668		Biological replicate 3	1605196		Biological replicate 3	1551677
Biological replicate 4	1946564								Biological replicate 4	1912316
Biological replicate 5	2031177
Biological replicate 6	1850726
ETC Complex IV
WT LN CD8+			T-IEL TCRb CD8ab			T-IEL TCRb CD8aa			T-IEL TCRgd CD8aa
Biological replicate 1	575075		Biological replicate 1	1174652		Biological replicate 1	867936		Biological replicate 1	2611890
Biological replicate 2	471835		Biological replicate 2	805130		Biological replicate 2	1138750		Biological replicate 2	1508397
Biological replicate 3	316897		Biological replicate 3	1097719		Biological replicate 3	1189995		Biological replicate 3	790182
Biological replicate 4	549326								Biological replicate 4	988296
Biological replicate 5	486696
Biological replicate 6	352154
