# Supplementary material for: Tissue environment, not ontogeny, defines murine intestinal intraepithelial T lymphocytes
Source: eLife. 2021 Sep 2;10:e70055. doi: 10.7554/eLife.70055 (PMC8463072; doi:10.7554/eLife.70055)
Supplement: Figure 5—source data 1. [file elife-70055-fig5-data1.xlsx]

## Sheet: Sheet1
Cholesterol content (fig 5c)
pg/ml	WT LN CD8+	T-IEL TCRb CD8ab	T-IEL TCRb CD8aa	T-IEL TCRgd CD8aa
biological replicate 1	0.174493	0.434185	0.353913	0.357886
biological replicate 2	0.140714	0.336253	0.316253	0.400077
biological replicate 3	0.11572	0.604942	0.285834	0.679582
biological replicate 4	0.126483	0.618611	0.4958	0.638232
