# Supplementary material for: Tissue environment, not ontogeny, defines murine intestinal intraepithelial T lymphocytes
Source: eLife. 2021 Sep 2;10:e70055. doi: 10.7554/eLife.70055 (PMC8463072; doi:10.7554/eLife.70055)
Supplement: Figure 6—figure supplement 1—source data 1. [file elife-70055-fig6-figsupp1-data1.xlsx]

## Sheet: Sheet1
EpCam
geo mean	WT LN CD8+	T-IEL TCRb CD8ab	T-IEL TCRb CD8aa	T-IEL TCRgd CD8aa
Biological replicate 1	66	503	785	574
Biological replicate 2	60.9	376	719	522
Biological replicate 3	74.4	617	1229	856
E-Cadherin
geo mean	WT LN CD8+	T-IEL TCRb CD8ab	T-IEL TCRb CD8aa	T-IEL TCRgd CD8aa
Biological replicate 1	17.3	62.2	70.2	89.6
Biological replicate 2	15.1	51.6	76.5	88.4
Biological replicate 3	8.77	57.3	65.7	103
