# Supplementary material for: Tissue environment, not ontogeny, defines murine intestinal intraepithelial T lymphocytes
Source: eLife. 2021 Sep 2;10:e70055. doi: 10.7554/eLife.70055 (PMC8463072; doi:10.7554/eLife.70055)
Supplement: Figure 7—source data 1. [file elife-70055-fig7-data1.xlsx]

## Sheet: Sheet1
Exhaustion markers (fig 7d)						Purinergic receptors (fig 7b)
% of positive cells CD244	T-IEL TCRb CD8ab	T-IEL TCRb CD8aa	T-IEL TCRgd CD8aa			% of positive cells CD103	WT LN CD8+	T-IEL TCRb CD8ab	T-IEL TCRb CD8aa	T-IEL TCRgd CD8aa
biological replicate 1	68.1	98.8	99			biological replicate 1	65.1	98.5	81.3	88.1
biological replicate 2	85.8	99.6	99.7
biological replicate 3	66	97.6	98.7
biological replicate 4	58.7	94.7	94.3			% of positive cells CD73
% of positive cells Lag-3						biological replicate 1	64.9	98.4	100	100
biological replicate 1	86	95	89
biological replicate 2	71	96	84			% of positive cells P2X7R
biological replicate 3	70	94	78
biological replicate 4	69	94	81			biological replicate 1	2.39	62.4	80.3	99.9
% positive cells CD160
						% of positive cells CD39
biological replicate 1	53.3	68.5	57.4
biological replicate 2	35.5	65.6	46			biological replicate 1	0	6.03	91.1	60.1
biological replicate 3	45	58.1	54.9
biological replicate 4	45.5	59.8	54.3
						% of positive cells CD38
% positive cells CD96
						biological replicate 1	0	69.9	100	75.5
biological replicate 1	94.5	100	100
biological replicate 2	85	99	99
biological replicate 3	84	98	95
biological replicate 4	90	100	100
TOX MFI (fig 7h)
	WT LN CD8+	T-IEL TCRb CD8ab	T-IEL TCRb CD8aa	T-IEL TCRgd CD8aa
biological replicate 1	222	624	1292	964
biological replicate 2	218	642	1424	1114
biological replicate 3	229	537	1029	906
