# Supplementary material for: Tissue environment, not ontogeny, defines murine intestinal intraepithelial T lymphocytes
Source: eLife. 2021 Sep 2;10:e70055. doi: 10.7554/eLife.70055 (PMC8463072; doi:10.7554/eLife.70055)
Supplement: Figure 8—source data 1. [file elife-70055-fig8-data1.xlsx]

## Sheet: Sheet1
Phospho-ERK1/2 (fig 8a)
% of positive cells	WT LN CD8+ BR1	WT LN CD8+ BR2	WT LN CD8+ BR3	T-IEL TCRb CD8ab BR 1	T-IEL TCRb CD8ab BR 2	T-IEL TCRb CD8ab BR 3	T-IEL TCRb CD8aa BR1	T-IEL TCRb CD8aa BR2	T-IEL TCRb CD8aa BR3	T-IEL TCRgd CD8aa BR1	T-IEL TCRgd CD8aa BR2	T-IEL TCRgd CD8aa BR3
unstimulated	9.98	2.5	0.95	19.5	5.18	3.65	4.7	2.98	0.39	6.29	3.94	1.99
stimulated with aCD3	65.2	74.5	52.9	84.3	77.5	63.1	8.7	9.24	4.53	18.4	19.5	17.4
unstimulated + PP2	3.6	2.29	0.93	3.39	4.16	2.21	1.9	2.58	1.97	1.8	3.22	2.07
stimulated with aCD3+ PP2	3.41	2.29	0.82	2.79	5.1	3.46	1.2	3.54	1.57	1.25	2.81	1.66
Phospho-S6 (fig 8b)
% of positive cells	WT LN CD8+ BR1	WT LN CD8+ BR2	WT LN CD8+ BR3	T-IEL TCRb CD8ab BR 1	T-IEL TCRb CD8ab BR 2	T-IEL TCRb CD8ab BR 3	T-IEL TCRb CD8aa BR1	T-IEL TCRb CD8aa BR2	T-IEL TCRb CD8aa BR3	T-IEL TCRgd CD8aa BR1	T-IEL TCRgd CD8aa BR2	T-IEL TCRgd CD8aa BR3
unstimulated	13.1	7.59	7.43	26.3	10.2	13.8	6.44	4.15	4.04	8.99	8.52	5.8
stimulated with aCD3	82.2	93.1	85.6	85.4	90	87.1	15.1	15.1	12.7	23.3	31.6	28.1
unstimulated + PP2	2.46	2.43	2.4	2.73	3.41	5.16	1.8	2.05	2.94	1.87	2.01	2
stimulated with aCD3+ PP2	2.56	2.58	2.24	2.66	4.26	7.77	1.23	2.65	2.16	1.38	2.44	1.68
